1  
2  
3  
4  
5  
6  
7  
8  
9  
10  
11  
12  
13  
14  
15  
16  
17  
18  
19  
20  
21  
22  
23  
24  
25  
26  
27  
28  
29  
30  
31  
32  
33  
34  
35  
36  
37

Discovery Articles

## Genetic continuity in the last seven Millennia in human hepatitis B viruses

Xiaoyun Lei<sup>1,2</sup>, Ye Zhang<sup>1</sup>, and Shi Huang<sup>1\*</sup>

<sup>1</sup>Center for Medical Genetics, School of Biological Sciences, Central South University, 110 Xiangya Road, Changsha, Hunan 410078, China

<sup>2</sup> Institute of Molecular Precision Medicine, Xiangya Hospital, Central South University, 110 Xiangya Road, Changsha, Hunan 410078, China

\*Corresponding author: [huangshi@sklmg.edu.cn](mailto:huangshi@sklmg.edu.cn)  
The first two authors contributed equally to this work.

### Keywords:

Ancient DNA, hepatitis B virus HBV, slow clock

### Abstract

Hepatitis B virus (HBV) is a major human pathogen and yet the evolution history of HBV has largely remained uncertain. With a better theoretical understanding of genetic diversity, we here used a new method to examine the previously published ancient and present day HBV genomes. We identified an informative region in the HBV polymerase that is slow evolving and used it to study genetic distances among HBVs. Three ancient human HBV isolates from 4488-7074 years ago in Germany were identified as genotype G that is also presently common in the same country. We constructed a new phylogenetic tree of HBVs that placed genotype D as the most basal branch with an inferred age of ~20500 years, which is remarkably consistent with the worldwide distribution and a most parsimonious migration route of HBV genotypes today. These results help resolve the evolutionary history of HBV and provide a useful method for studying the phylogenetics of HBV and other viruses in general.

38 **Introduction:**

39 Hepatitis B virus (HBV) is a major cause of human hepatitis and related diseases  
40 (<http://www.who.int/mediacentre/factsheets/fs204/en/>). The origin and evolution of  
41 HBV has largely remained uncertain, like most viruses. HBV has a circular, partially  
42 double-stranded DNA genome of about 3.2kbp that encodes four overlapping open  
43 reading frames (P polymerase, pre-S/S envelope, pre-C/C core protein, and X). At  
44 least 8 genotypes (A–H) based on nucleotide sequence similarity are classified for  
45 human HBV and they have a heterogeneous global distribution (Castelhano, Araujo,  
46 Arenas 2017). The putative basal genotypes F and H are found exclusively in the  
47 Americas, thus inconsistent with the notion that HBV co-evolved with modern humans  
48 as part of the Recent Out of Africa hypothesis. Yet, HBVs in non-human primates  
49 (NHP), such as chimpanzees and gorillas, are phylogenetically related to human HBV  
50 isolates, seemingly supporting the idea of an Africa origin of the virus (Locarnini et al.  
51 2013; Souza et al. 2014).

52 Recently, a number of ancient HBV genomes have been uncovered from human  
53 skeletons found in Europe and Asia that are between approximately 500-7000 years  
54 ago (Kahila Bar-Gal et al. 2012; Krause-Kyora et al. 2018; Muhlemann et al. 2018).  
55 While most of the relatively younger HBV genomes (<4488 years ago) were closest to  
56 present day human HBVs, all three oldest HBV samples found in Germany (between  
57 4488-7074 years ago) were unexpectedly closest to chimpanzee or gorilla HBVs and  
58 hence considered extinct today. The finding challenges expectations as HBV today  
59 must have an ancient ancestor which must have infected a large population in the  
60 past to have a chance to survive to the present. As large populations have a greater  
61 probability of having some of its remains discovered today, the probability of  
62 discovering an ancestor of today's human HBVs should be much greater than that of  
63 finding a now extinct ancient human HBV sample. Thus, the unusually high rate of  
64 discovering ancient human HBV samples that are now extinct (3 independent  
65 samples in 3 different archaeological sites) indicates potential flaws in the  
66 phylogenetic method employed, especially given that existing methods have yet to  
67 produce a consistent evolutionary history of the HBVs. Importantly, the theoretical  
68 framework underlying the existing methods, the neutral theory, has been widely  
69 known to be inadequate as an explanatory theory of the observed genetic diversity  
70 patterns (Kreitman 1996; Ohta, Gillespie 1996; Hahn 2008; Leffler et al. 2012; Hu et al.  
71 2013; Kern, Hahn 2018). It is unfortunate that existing phylogenetic methods have  
72 relied heavily on the neutral theory being a valid interpretation of nature.

73 Different positions in a viral genome are known to have different mutation rates.  
74 The fast changing sites in influenza virus play adaptive roles in escaping host immune  
75 defense and undergo constant and quick turnovers (Shih et al. 2007). The antigenic  
76 sites in human influenza A virus mutate and turn over quickly (several times within a  
77 30 year period), which is critical for the virus to escape host immune defense and  
78 hence for flu epidemics. In contrast, other sites stayed largely unchanged within the  
79 same period. The influenza results illustrate two general points with regard to  
80 evolutionary dynamics of a genome that have so far been overlooked. First, fast  
81 evolving or less conserved DNAs are also functional rather than neutral as they are

82 essential for quick adaptive needs in response to fast changing environments.  
83 Second, fast evolving DNAs turn over quickly and can be shown to violate the infinite  
84 sites model. Hence, they cannot be used for phylogenetic inference involving  
85 evolutionary timescales. If one uses the fast changing sites in a flu virus to infer the  
86 phylogenetic relationship of the virus isolates responsible for different epidemics in a  
87 past period of say 10 years, one would have reached the erroneous conclusion that  
88 each epidemic was caused by a distinct type of flu virus with no genetic continuity  
89 among them rather than just minor variations of the same type.

90 For short term lineage divergence that has yet to reach saturation for the fast  
91 changing sites, both fast and slow changing sequences could be informative to  
92 phylogeny. However, for evolutionary timescale where divergence in fast changing  
93 sites have reached saturation, only the slow sites (the slow clock method) could be  
94 informative, as has been previously shown and explained by the maximum genetic  
95 diversity (MGD) hypothesis (Huang 2012; Hu et al. 2013; Huang 2016; Yuan, Huang  
96 2017; Yuan et al. 2017). The MGD hypothesis has recently solved the longstanding  
97 puzzle of genetic diversity (Huang 2009; Huang 2016) and made it now possible for  
98 the first time to realistically infer phylogenetic relationships based on genetic diversity  
99 data. It has now been demonstrated that genetic diversities are mostly at saturation  
100 level (Yuan et al. 2012; Yuan et al. 2014; Zhu et al. 2015a; Zhu et al. 2015b; Gui, Lei,  
101 Huang 2017; He et al. 2017; Lei, Huang 2017; Lei et al. 2018; Teske et al. 2018), which  
102 therefore renders most of the past molecular results invalid since those results were  
103 based on mistreating saturated phases of genetic distance as linear phases. Only  
104 slow evolving nuclear sequences are still at linear phase and hence informative to  
105 phylogenetic relationships.

106 Here, we investigated the genetic relationships among the ancient HBVs and  
107 present day human HBVs using the slow clock method. We found that all three  
108 ancient HBV samples that were thought to group with NHP isolates in fact grouped  
109 with human HBVs. We also constructed a new phylogenetic tree of the human HBV  
110 genotypes, which is remarkably consistent with their distribution patterns.

111

## 112 **Results**

### 113 **Identity analyses in nucleotide and amino acid sequences**

114 We selected 3 ancient HBV genomes from Germany for analyses here, 7074 year  
115 old Karsdorf from LBK culture in Lower-Saxony, 5353 year old Sorsum from  
116 Funnelbeaker culture from Lower-Saxony, and 4488 year old RISE563 from Bell  
117 Beaker culture in Osterhofen-Altenmarkt (Krause-Kyora et al. 2018; Muhlemann et al.  
118 2018). The other Bronze age samples were not studied as one (RISE254) was very  
119 close to RISE563 and the others had many sequence gaps. In nucleotide identity, the  
120 three ancient samples were all closer to each other than to any present day samples,  
121 and the highest identity was between Sorsum and RISE563 (Table 1).

122

123

124

125

126 **Table 1. Nucleotide identity among the three ancient HBV genomes**

127

| Samples  | Nucleotide identity |        |         |
|----------|---------------------|--------|---------|
|          | Karsdorf            | Sorsum | RISE563 |
| Karsdorf |                     | 94.8%  | 93.0%   |
| Sorsum   |                     |        | 95.1%   |
| RISE563  |                     |        |         |

128 Gaps not included in the identity calculation.

129

130 We searched the Genbank protein database to identify the closest present day  
 131 HBV genome to the ancient HBVs in amino acid identity in the polymerase, the largest  
 132 open reading frame in the HBV genome (832-845 amino acids). Upon identifying the  
 133 closest, we also examined its identity to the ancient HBV in other proteins, pre S, X,  
 134 and core proteins (Table 2). Present day HBV isolates closest to the ancient HBVs in  
 135 nucleotide identity were not found to be the closest in amino acid identity in the  
 136 polymerase. For example, the Karsdorf sample was closest to a chimpanzee HBV  
 137 (accession AB032433) in nucleotide sequence but a human HBV (HE981175,  
 138 genotype G) in amino acid sequence in the polymerase. However, in other proteins,  
 139 the closest to the ancient HBVs were all present day NHP HBVs (Table 2).

140

141 **Table 2. Amino acid identities in the polymerase among ancient and present day**  
 142 **HBV genomes.**

143

| Proteins   | Species   | Karsdorf (7074)          |          | Sorsum (5353)            |          | RISE563 (4488)           |          |
|------------|-----------|--------------------------|----------|--------------------------|----------|--------------------------|----------|
|            |           | Access.                  | Identity | Access.                  | Identity | Access.                  | Identity |
| Polymerase | Human     | HE981175                 | 92.9%    | EU239218                 | 92.5%    | EU239218                 | 90.8%    |
|            | Chimp.    | <a href="#">AB032433</a> | 92.6%    | <a href="#">AB032433</a> | 92.5%    | AB032433                 | 90.9%    |
|            | Gorilla   | AJ131567                 | 90.6%    | AJ131567                 | 90.6%    | <a href="#">AJ131567</a> | 89.4%    |
|            | Orangutan | AF193863                 | 88.2%    | AF193863                 | 88.3%    | AF193863                 | 87.4%    |
|            | Gibbon    | AJ131571                 | 91.3%    | AJ131571                 | 89.8%    | AJ131571                 | 88.7%    |
|            | Karsdorf  | Karsdorf                 |          | Karsdorf                 | 95.5%    | Karsdorf                 | 93.5%    |
|            | Sorsum    | Sorsum                   | 95.5%    | Sorsum                   |          | Sorsum                   | 94.8%    |
|            | RISE563   | LT992443                 | 93.5%    | LT992443                 | 94.8%    | LT992443                 |          |
| Pre S      | Human     | HE981175                 | 91.1%    | EU239218                 | 92.3%    | EU239218                 | 91.7%    |
|            | Ape       | AB032433                 | 92.6%    | AB032433                 | 95.6%    | AJ131567                 | 91.5%    |
| X prot.    | Human     | HE981175                 | 83.1%    | EU239218                 | 87.4%    | EU239218                 | 85.3%    |
|            | Ape       | AB032433                 | 84.4%    | AB032433                 | 90.9%    | AJ131567                 | 91.7%    |
| Core prot. | Human     | HE981175                 | 94.2%    | EU239218                 | 91.7%    | EU239218                 | 92.6%    |
|            | Ape       | AB032433                 | 99.3%    | AJ131567                 | 96.1%    | AJ131567                 | 98.7%    |

144 Note: Approximate age in years of ancient HBV samples is indicated next to sample  
 145 name. The closest human HBV to the ancient HBV in polymerase identity was  
 146 selected for comparison. Gaps were excluded in the identity calculation. The

147 underlined accession numbers indicate the closest modern HBV to the ancient HBV in  
148 nucleotide identity as previously published.

149

150 The 3 ancient HBV genomes were also closest to each other in polymerase  
151 amino acid identity than to any other present day samples (Table 2). However,  
152 different from the nucleotide result, the highest amino acid identity in polymerase was  
153 between Karsdorf and Sorsum. As Sorsum differs from RISE563 in both time periods  
154 and locations while only in time periods from Karsdorf, Sorsum is expected to be a  
155 closer relative of Karsdorf and hence to have more similarity in slow changing sites  
156 (amino acid) with Karsdorf. On the other hand, as Sorsum was 1721 years apart from  
157 Karsdorf, ~2 fold more than its time difference with RISE563 (865 years), Sorsum is  
158 expected to have more genetic distance from Karsdorf due to fast changing sites as  
159 may be reflected in the nucleotide sequence. Together, these results showed  
160 significant disconnect between amino acid and nucleotide sequences in revealing  
161 genetic relationships among HBVs.

162 While results in Table 2 showed clear affinity of Karsdorf with human HBV,  
163 Sorsum showed equal affinity with human and chimpanzee HBVs and RISE563  
164 showed slightly more affinity to chimpanzee than to human HBV, indicating some  
165 uncertainty regarding the informative nature of the full length polymerase protein. The  
166 polymerase is composed of 4 domains, terminal protein, non-conserved spacer,  
167 reverse transcriptase, and RNase H. Upon examining the HBVdb database  
168 (<https://hbvdb.ibcp.fr/>) (Hayer et al. 2013), together with our own alignment analyses,  
169 we found that the amino acid region corresponding to the reverse transcriptase and  
170 RNase H domains are more conserved or slow evolving (343-844 aa for genotype G  
171 starting with VNL). We therefore tested this 501 aa region to see if it may show better  
172 results than the full length polymerase in linking ancient HBVs with human rather than  
173 NHP (Table 3). Again, all three ancient HBVs showed closer identity, but to a greater  
174 degree, to human HBVs than to NHP HBVs. While Karsdorf was again closest to  
175 Sorsum, it was closer to a present day human HBV (HE981175) than to the ancient  
176 HBV RISE563, indicating clear HBV genetic continuity from the time of Karsdorf to  
177 present time and the more informative nature of the 501 aa slow region of the  
178 polymerase.

179 As slow evolving DNAs are more likely to be in linear phase and hence more  
180 informative to phylogenetic relationships as explained by the MGD theory, we  
181 examined whether the 501 aa slow region of the polymerase is the slowest evolving  
182 among the protein genes in the HBV genome by comparing amino acid identity  
183 between human and orangutan HBV proteins (Supplementary Table S1). The 501 aa  
184 slow region of the polymerase was found to be the second most conserved, just  
185 slightly less conserved than the core protein. However, because the core protein was  
186 relatively short (178 aa), it is expected to be less informative than a longer protein with  
187 similar degree of conservation. Together with outgroup analyses (see below), we have  
188 found the 501 aa slow region of the polymerase to be the most informative to  
189 phylogenetic inferences of HBV strains.

190

191  
192  
193  
194  
195  
196

**Table 3. Amino acid identity among ancient and present day HBV genomes in the slow region (501 aa)**

| Species   | Karsdorf (7074) |          | Sorsum (5353)   |          | RISE563 (4488)  |          |
|-----------|-----------------|----------|-----------------|----------|-----------------|----------|
|           | Access.         | Identity | Access.         | Identity | Access.         | Identity |
| Human     | HE981175        | 96.0%    | HE981175        | 95.4%    | EU239218        | 93.9%    |
| Chimp.    | <u>AB032433</u> | 93.8%    | <u>AB032433</u> | 95.2%    | AB032433        | 93.5%    |
| Gorilla   | AJ131567        | 93.8%    | AJ131567        | 95.2%    | <u>AJ131567</u> | 93.7%    |
| Orangutan | AF193863        | 92.0%    | AF193863        | 93.2%    | AF193863        | 92.1%    |
| Gibbon    | AJ131571        | 93.2%    | AJ131571        | 94.0%    | AJ131571        | 92.2%    |
| Karsdorf  | Karsdorf        |          | Karsdorf        | 97.4%    | Karsdorf        | 94.6%    |
| Sorsum    | Sorsum          | 97.4%    | Sorsum          |          | Sorsum          | 96.2%    |
| RISE563   | LT992443        | 94.6%    | LT992443        | 96.2%    | LT992443        |          |

197 HBV genomes selected for comparison were the same as those in Table 2. The  
198 underlined accession numbers indicate the closest modern HBV to the ancient HBV in  
199 nucleotide identity as previously published.

200

### 201 **Outgroup inferences based on amino acid mutations**

202 The above results raise the important question of which type of sequences may  
203 be most informative to HBV phylogeny. For viruses, different hosts may confer  
204 different physiological selection pressures which may result in viruses from different  
205 hosts to have drastic or non-conservative amino acid changes. Taking into account of  
206 non-conservative changes may thus be informative to phylogenetic relationships  
207 where an outgroup NHP HBV to two sister strains of human HBV is expected to show  
208 more non-conservative amino acid changes from the human HBVs.

209 To confirm the human rather than NHP affinity of the ancient HBV isolates as  
210 shown by the polymerase, we therefore performed protein alignment involving 3  
211 strains, an ancient HBV, its closest human HBV, and its closest NHP HBV. It is  
212 expected that an outgroup should have a higher fraction of non-conservative or  
213 drastic amino acid changes among all mutations that led to differences between the  
214 outgroup and the other two sister strains. We examined those positions where the two  
215 sisters had the same residue while the outgroup was different. We tested each of the  
216 three compared HBV viruses as the candidate outgroup and obtained the fraction of  
217 drastic changes among all positions where the two sisters were the same while the  
218 outgroup was different (Table 4 and Supplementary Materials for details of this  
219 analysis). For the full length polymerase protein, RISE563 as the outgroup had a  
220 significantly smaller fraction of drastic changes than the gorilla HBV as the outgroup  
221 (0.33 vs 0.69,  $P = 0.004$ ). This indicates that RISE563 and present day human HBV  
222 (EU239218) were sister strains while the gorilla HBV was the outgroup. Similar  
223 analyses showed that for Karsdorf and Sorsum samples, the NHP HBVs all showed  
224 the highest fraction of drastic changes (Table 4). We also performed the combined

225 analysis where we first add up all the drastic changes of an outgroup (with the  
 226 outgroup being ancient HBV, present day human HBV, or NHP HBV) and then  
 227 calculated the fraction of drastic changes. The fraction of drastic changes in the NHP  
 228 HBV when tested as the outgroup was significantly higher than either that in the  
 229 ancient HBVs or the present day human HBVs when they were tested as the outgroup.  
 230 We also obtained similar results for the slow region of the polymerase (Table 4).  
 231 These results confirmed that ancient HBVs isolates grouped with human rather than  
 232 NHP HBVs.

233

234 **Table 4. Outgroup inferences from non-conservative (drastic) amino acid**  
 235 **changes.**

236

| Outgroup             |           | Polymerase |     |          |           | Slow region (aa 343-844) |     |          |           |
|----------------------|-----------|------------|-----|----------|-----------|--------------------------|-----|----------|-----------|
|                      |           | Mutations  |     | Fraction | P value   | Mutations                |     | Fraction | P value   |
| Isolates             | Accession | Drastic    | All | Drastic  | Hu. v Ape | Drastic                  | All | drastic  | Hu. v Ape |
| Karsdorf             | NA        | 5          | 16  | 0.31     | 0.02      | 5                        | 10  | 0.50     | n.s.      |
| Human                | HE981175  | 9          | 24  | 0.38     | 0.02      | 4                        | 9   | 0.44     | n.s.      |
| Chimpanzee           | AB032433  | 16         | 22  | 0.73     |           | 11                       | 15  | 0.73     |           |
| Sorsum               | NA        | 7          | 16  | 0.44     | n.s.      | 2                        | 6   | 0.33     | n.s.      |
| Human                | EU239218  | 18         | 39  | 0.46     | n.s.      | 5                        | 18  | 0.28     | n.s.      |
| Chimpanzee           | AJ131575  | 26         | 39  | 0.67     |           | 4                        | 7   | 0.57     |           |
| RISE563              | LT992443  | 8          | 24  | 0.33     | 0.004     | 2                        | 6   | 0.44     | n.s.      |
| Human                | EU239218  | 16         | 32  | 0.50     | n.s.      | 2                        | 13  | 0.24     | n.s.      |
| Gorilla              | AJ131567  | 27         | 39  | 0.69     |           | 12                       | 16  | 0.75     |           |
| <b>Sum</b>           |           |            |     |          |           |                          |     |          |           |
| <b>Ancient human</b> |           | 20         | 56  | 0.36     | <0.0001   | 9                        | 22  | 0.41     | 0.03      |
| <b>Present human</b> |           | 43         | 95  | 0.45     | 0.0003    | 11                       | 40  | 0.28     | 0.0002    |
| <b>Ape</b>           |           | 69         | 100 | 0.69     |           | 27                       | 38  | 0.71     |           |

237 Drastic or non-conservative and conservative changes were according to the  
 238 designation by the blastp algorithm. Numbers of these changes can be found in the  
 239 Supplementary Table S2. P value was from Fisher's test.

240

241

242 In contrast, for the other three smaller size proteins of HBV genome, the Pre S  
 243 protein, the X protein and the pre core protein, none was found informative in  
 244 identifying an outgroup (Supplementary Table S2). When we did the same analysis by  
 245 using these three proteins as concatenated single molecule, we also failed to identify  
 246 any clear outgroup. The fractions of drastic changes in either ancient or present day  
 247 human HBVs were similar to that of NHP and showed enrichment of non-conservative  
 248 amino acid changes, which was unlike the case for the polymerase. Thus, the ancient  
 249 HBVs did not group with either present day NHP or human in any of these proteins.  
 250 That the observed changes were enriched for non-conservative amino acid mutations  
 251 indicated functional adaptation or selection. Although ancient HBVs all showed  
 252 slightly closer identities in these proteins to NHP HBVs, such weak affinity may be

253 fortuitous.

254

255

256 **Table 5. Average pairwise identities in the slow region of the HBV polymerase**  
257 **(501 aa)**

| Genotype | Identical number of amino acids |        |        |        |        |        |        |        |                  |                     |
|----------|---------------------------------|--------|--------|--------|--------|--------|--------|--------|------------------|---------------------|
|          | A                               | B      | C      | D      | E      | F      | G      | H      | All <sup>1</sup> | Lowest <sup>2</sup> |
| A        |                                 | 460.75 | 455.75 | 458.25 | 460.5  | 454    | 467    | 451.5  | 458.25           | 468                 |
| B        | 460.75                          |        | 467.25 | 461.5  | 463    | 463.5  | 468.5  | 461.5  | 463.71           | >467                |
| C        | 455.75                          | 467.25 |        | 458.25 | 461.5  | 455.5  | 465.5  | 454    | 459.68           | >467                |
| D        | 458.25                          | 461.5  | 458.25 |        | 460.75 | 459    | 461.5  | 458    | 459.61           | 461                 |
| E        | 460.5                           | 463    | 461.5  | 460.75 |        | 460    | 471.25 | 453.75 | 461.54           | >471                |
| F        | 454                             | 463.5  | 455.5  | 459    | 460    |        | 461.25 | 474    | 461.04           | >474                |
| G        | 467                             | 468.5  | 465.5  | 461.5  | 471.25 | 461.25 |        | 460.75 | 465.11           | 482                 |
| H        | 451.5                           | 461.5  | 454    | 458    | 453.75 | 474    | 460.75 |        | 459.07           | 488                 |

258 <sup>1</sup>Average identities of a genotype to all other genotypes. <sup>2</sup>Lowest pairwise identities  
259 within the genotype.

260

261

262

### 263 **Phylogenetic relationships among HBV genotypes**

264 The above results suggest that the slow region of the polymerase (aa 343-844)  
265 may be the most informative with regard to HBV phylogenetic relationships. We next  
266 used this region to reconstruct the phylogenetic tree for the 8 HBV genotypes by using  
267 the reference genomes for these genotypes (2 genomes for each genotype) as  
268 indexed by the HBVdb database. We first obtained the pairwise identities in the slow  
269 region among the 8 genotypes or 16 genomes and the average identity of each  
270 genotype to the other 7 genotypes (Table 5 and Supplementary Table S3). We also  
271 determined the lowest pairwise identity within each genotype by searching the  
272 Genbank database using the reference genomes and found D to have the lowest  
273 within genotype identity (461 aa), indicating that D has the largest within genotype  
274 genetic diversity among all genotypes. As D was also among the lowest in identity to  
275 all other genotypes (459.61, just slightly greater than the lowest H), D qualifies as the  
276 most basal genotype. We constructed a schematic diagram of the phylogenetic tree  
277 that best fits the data in Table 5 (Figure 1A). Relative to the existing tree (Figure 1B),  
278 the new tree is more consistent with the present day distribution pattern of the HBV  
279 genotypes (Figure 1C). In particular, consistent with expectations, the basal type D is  
280 the most widely distributed and most common in Northeast Asia and Russia/Siberia,  
281 and well positioned to split the first branch, genotype F and H, specific to the New  
282 World.

283

284

285



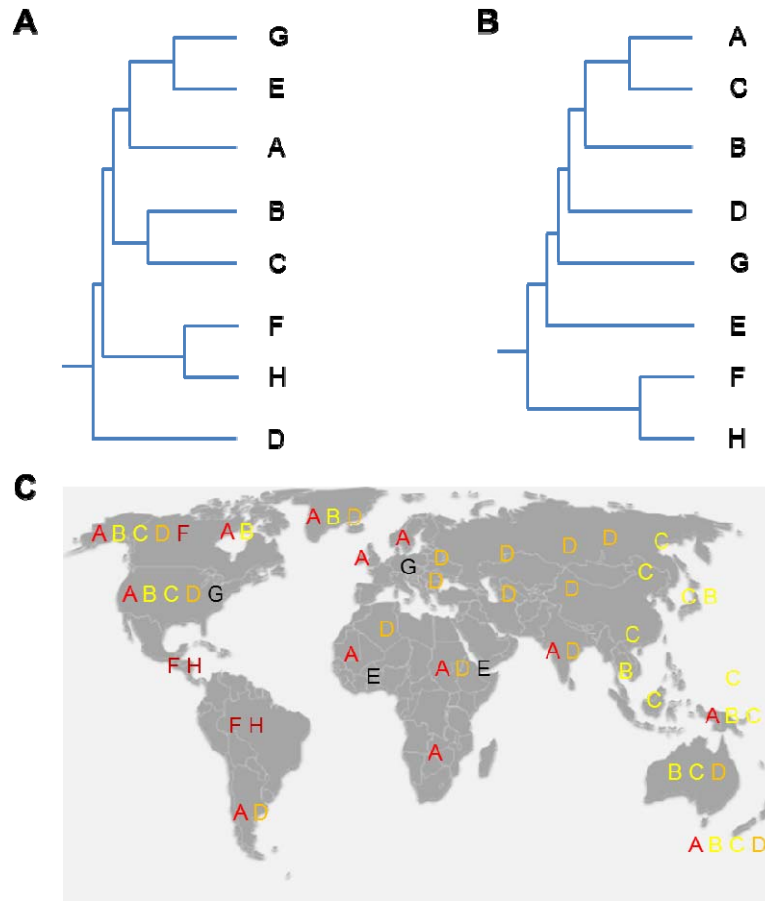

286

287

288 **Figure 1. Phylogenetic tree of HBV genotypes.** Branch lengths are relatively and  
289 roughly to scale. The tree is meant to be more of a schematic diagram. A. Tree built  
290 by using the slow region. B. Tree built by using nucleotide sequences as found in  
291 Muhlemann et al (Muhlemann et al. 2018). C. Distribution map of HBV genotypes.

292

293

294 Using the slow region of the polymerase, we also examined the relationships of  
295 selected NHP HBVs with the human reference genomes and found closer relative  
296 affinity of African NHP HBVs with genotype G and of Asian NHP HBVs with genotype  
297 C (Table 6). Although we only looked at one HBV genome each for each NHP species,  
298 the closest chimpanzee and gorilla in nucleotide sequence to the ancient human  
299 HBVs and an arbitrarily chosen orangutan and gibbon HBV, the relative affinity should  
300 hold for other NHP HBVs. We also examined the identity of ancient HBVs with the  
301 human HBV reference genomes and found all three to be most related to genotype G,  
302 with Sorsum and RISE563 relatively closer to genotype E than Karsdorf. The results  
303 suggest that Sorsum and RISE563 may be on their way diverging from genotype G to  
304 E. Based on the amino acid difference between Karsdorf and genotype G (501-479 =  
305 22 amino acid) and the age of Karsdorf, we inferred the mutation rate in the slow  
306 region to be  $2.0 \times 10^{-6}$  aa per aa per year and the age of G at ~14500 years (14500 x

307  $501 \times 2.0 \times 10^{-6} + 7500 \times 501 \times 2.0 \times 10^{-6} = 22$  aa). Given the distance between the  
308 basal genotype D and the other genotypes to be ~41 as well as the largest within  
309 genotype distance of 40 for D, we inferred an origination of human HBV at ~20500  
310 years ago followed soon by the divergence of genotype F and H as people crossed  
311 the Bering Strait into the New World.

312

313 **Table 6. Identities between NHP and ancient HBV isolates with the reference**  
314 **genomes of human HBV genotypes**

315

| Genotype | Identical number of amino acids |          |           |          |          |        |         |
|----------|---------------------------------|----------|-----------|----------|----------|--------|---------|
|          | AB032433                        | AJ131567 | AF193863  | AJ131571 |          |        |         |
|          | Chimp.                          | Gorilla  | Orangutan | Gibbon   | Karsdorf | Sorsum | RISE563 |
| A        | 458                             | 459      | 449       | 452      | 470      | 467    | 463     |
| B        | 463                             | 461.5    | 457       | 462      | 467      | 473.5  | 468.5   |
| C        | 462.5                           | 459      | 463       | 461.5    | 463.5    | 470    | 467     |
| D        | 459.5                           | 460      | 454.5     | 455.5    | 463      | 468.5  | 461     |
| E        | 463.5                           | 461      | 455.5     | 456.5    | 461      | 469    | 470.5   |
| F        | 458.5                           | 459      | 454       | 458      | 461.5    | 466.5  | 471.5   |
| G        | 468                             | 466      | 458       | 465      | 479      | 476    | 475.5   |
| H        | 454                             | 454.5    | 452.5     | 462      | 455.5    | 460.5  | 466     |

316 Values represent the average of two genomes of each genotype.

317

318

### 319 Discussion

320 Our results suggest genetic continuity in the last seven Millennia for human HBV  
321 and establish a more informative method for building phylogenetic trees for HBVs.  
322 Our findings on the ancient HBV isolates here, rather than the conclusions from  
323 previous analyses (Krause-Kyora et al. 2018; Muhlemann et al. 2018), appear more  
324 consistent with a priori expectation on the ancient ancestors. That the oldest Karsdorf  
325 sample (7074 years ago) found in Germany was closest to present day genotype G  
326 that is also common in Germany, France and the United States is also consistent with  
327 expectation and further supports the conclusion of genetic continuity in HBVs in the  
328 last 7000 years (Sunbul 2014). That Sorsum and RISE563 samples were closely  
329 related to Karsdorf indicates also an affinity of these two isolates with genotype G  
330 although they were relatively more related to genotype E than Karsdorf. E is the most  
331 closely related to G among present HBV isolates. As E is found today only in Africa  
332 (Andernach, Hubschen, Muller 2009), our finding here is in line with the known  
333 migration of Europeans into Africa during the last 5000 year period (Fregel et al.  
334 2018).

335 The closer nucleotide distance of Sorsum with RISE563 than with Karsdorf may  
336 reflect linear phase distance whereas the closer amino acid distance of Sorsum with  
337 Karsdorf may reflect continuity in housekeeping functions. That Karsdorf was most  
338 similar to gorilla HBV in nucleotide sequence but to present day human HBV in amino

339 acid sequence in the polymerase or the slow region may reflect continuation in the  
340 housekeeping physiology of the viruses and merely fortuitous similarities in nucleotide  
341 sequences reflecting some shared environmental adaptation. The closer similarity of  
342 ancient HBVs with NHP HBVs in non-polymerase proteins may reflect  
343 non-housekeeping adaptive roles in these proteins: the ancient HBV non-polymerase  
344 proteins in the ancient human hosts are expected to be more similar to NHP proteins  
345 given that the primitive life style of ancient humans may be less different from that of  
346 NHP.

347 The three ancient samples differ from genotype G however in that they lacked the  
348 36 nucleotide insertion in the core gene region that is specific to HBV-G. This  
349 indicates that the insertion of this 36 bp sequence may have taken place later than  
350 7000 years ago.

351 Genotype D is known to have the largest worldwide distribution, which is  
352 consistent with its basal position in the new tree here and its widest within genotype  
353 genetic diversity as found here. D shares the 33 nucleotide deletion in the pre S  
354 region with the NHP HBVs and the ancient HBVs, again indicating its more primitive  
355 nature. As all present day genotypes other than D lacks the 33 nucleotide deletion, we  
356 can infer that this deletion occurred only in the last few thousand years and  
357 independently in each genotype. As African NHP HBVs were closer to G while Asian  
358 NHP HBVs were closer to C, there was likely transmission of human HBVs into NHPs  
359 via migration of G from Europe into Africa and migration of C in the Asia mainland  
360 where it is most common today into the islands in Southeast Asia.

361 The new HBV phylogenetic tree appears more consistent with the reality  
362 genotype distribution around the globe than the existing ones and has implications for  
363 the origin of the virus. That the first split was between D and the rest followed by the  
364 split of F and H indicates that HBV may have originated in a region covering Northeast  
365 Asia and Siberia where D may have originated. It then went to either the West to give  
366 rise to G, E, and A or the South to give rise to B and C. The estimated age of the  
367 human HBV of ~20500 years corresponds to the period of Last Glacial Maximum  
368 (LGM), indicating that human population expansion post LGM may have played a role  
369 in the origin of HBV (Tallavaara et al. 2015).

370 The study here demonstrates the informative nature of the slow clock method in  
371 resolving the longstanding uncertainty on HBV origin and evolution. While it is widely  
372 known that different regions of a virus genome may produce different phylogenetic  
373 trees, it remains uncertain as to which region or whether the whole genome is the  
374 most informative to phylogenetic inferences. The MGD theory and the study here  
375 illustrate the informative nature of the slow evolving regions. The method should be  
376 generally applicable to evolutionary studies of other viruses.

377

378

### 379 **Materials and Methods:**

380 Present day HBV sequences were retrieved from Genbank and HBVdb database.  
381 Ancient HBV genomes were downloaded using previously published accession  
382 numbers. Alignments in nucleotide and amino acid sequences were done by blast.

383 Fisher's exact test was used to estimate p values, 2 tailed.

384

385 **Acknowledgements:**

386 We thank Ben Krause-Kyora and Julian Susat for sharing the sequences of ancient  
387 human HBV samples. This work is supported by the National Natural Science  
388 Foundation of China grant 81171880, the National Basic Research Program of China  
389 grant 2011CB51001, and the Furong Scholars program (S. H.).

390

391 **Author contributions:** XL, YZ, SH designed the study and performed data analyses.  
392 SH wrote the first draft and all authors contributed to the final version.

393

394 **Financial Interest statements:** The authors declare that they have no competing  
395 interests that might be perceived to influence the results and/or discussion reported in  
396 this paper.

397

398

399 **Tables:**

400

401

402 **Figure legends:**

403 **Figure 1. Phylogenetic tree of HBV genotypes.** Branch lengths are relatively and  
404 roughly to scale. The tree is meant to be more of a schematic diagram. A. Tree built  
405 by using the slow region. B. Tree built by using nucleotide sequences as found in  
406 Muhlemann et al (Muhlemann et al. 2018). C. Distribution map of HBV genotypes.

407

408

409 **References:**

- 410 Andernach, IE, JM Hubschen, CP Muller. 2009. Hepatitis B virus: the genotype E  
411 puzzle. *Rev Med Virol* 19:231-240.
- 412 Castelhana, N, NM Araujo, M Arenas. 2017. Heterogeneous recombination among  
413 Hepatitis B virus genotypes. *Infect Genet Evol* 54:486-490.
- 414 Fregel, R, FL Mendez, Y Bokbot, et al. 2018. Ancient genomes from North Africa  
415 evidence prehistoric migrations to the Maghreb from both the Levant and  
416 Europe. *Proc Natl Acad Sci U S A* 115:6774-6779.
- 417 Gui, Y, X Lei, S Huang. 2017. Collective effects of common SNPs and genetic risk  
418 prediction in type 1 diabetes. *Clin Genet*.
- 419 Hahn, MW. 2008. Toward a selection theory of molecular evolution. *Evolution*  
420 62:255-265.
- 421 Hayer, J, F Jadeau, G Deleage, A Kay, F Zoulim, C Combet. 2013. HBVdb: a  
422 knowledge database for Hepatitis B Virus. *Nucleic Acids Res* 41:D566-570.
- 423 He, P, X Lei, D Yuan, Z Zhu, S Huang. 2017. Accumulation of minor alleles and risk  
424 prediction in schizophrenia. *Sci Rep* 7:11661.
- 425 Hu, T, M Long, D Yuan, Z Zhu, Y Huang, S Huang. 2013. The genetic equidistance  
426 result, misreading by the molecular clock and neutral theory and

- 427 reinterpreted nearly half of a century later. *Sci China Life Sci* 56:254-261.
- 428 Huang, S. 2009. Inverse relationship between genetic diversity and epigenetic  
429 complexity. Preprint available at Nature  
430 Precedings:doi.org/10.1038/npre.2009.1751.1032.
- 431 Huang, S. 2012. Primate phylogeny: molecular evidence for a pongid clade excluding  
432 humans and a prosimian clade containing tarsiers. *Sci China Life Sci*  
433 55:709-725.
- 434 Huang, S. 2016. New thoughts on an old riddle: What determines genetic diversity  
435 within and between species? *Genomics* 108:3-10.
- 436 Kahila Bar-Gal, G, MJ Kim, A Klein, et al. 2012. Tracing hepatitis B virus to the 16th  
437 century in a Korean mummy. *Hepatology* 56:1671-1680.
- 438 Kern, AD, MW Hahn. 2018. The Neutral Theory in Light of Natural Selection. *Mol Biol*  
439 *Evol* 35:1366-1371.
- 440 Krause-Kyora, B, J Susat, FM Key, et al. 2018. Neolithic and medieval virus genomes  
441 reveal complex evolution of hepatitis B. *Elife* 7.
- 442 Kreitman, M. 1996. The neutral theory is dead. Long live the neutral theory. *Bioessays*  
443 18:678-683; discussion 683.
- 444 Leffler, EM, K Bullaughey, DR Matute, WK Meyer, L Segurel, A Venkat, P Andolfatto,  
445 M Przeworski. 2012. Revisiting an old riddle: what determines genetic diversity  
446 levels within species? *PLoS Biol* 10:e1001388.
- 447 Lei, X, S Huang. 2017. Enrichment of minor allele of SNPs and genetic prediction of  
448 type 2 diabetes risk in British population. *PLoS ONE* 12:e0187644.
- 449 Lei, X, J Yuan, Z Zhu, S Huang. 2018. Collective effects of common SNPs and risk  
450 prediction in lung cancer. *Heredity*:doi:10.1038/s41437-41018-40063-41434.
- 451 Locarnini, S, M Littlejohn, MN Aziz, L Yuen. 2013. Possible origins and evolution of  
452 the hepatitis B virus (HBV). *Semin Cancer Biol* 23:561-575.
- 453 Muhlemann, B, TC Jones, PB Damgaard, et al. 2018. Ancient hepatitis B viruses from  
454 the Bronze Age to the Medieval period. *Nature* 557:418-423.
- 455 Ohta, T, JH Gillespie. 1996. Development of Neutral and Nearly Neutral Theories.  
456 *Theor Popul Biol* 49:128-142.
- 457 Shih, AC, TC Hsiao, MS Ho, WH Li. 2007. Simultaneous amino acid substitutions at  
458 antigenic sites drive influenza A hemagglutinin evolution. *Proc Natl Acad Sci U*  
459 *S A* 104:6283-6288.
- 460 Souza, BF, JF Drexler, RS Lima, O Rosario Mde, EM Netto. 2014. Theories about  
461 evolutionary origins of human hepatitis B virus in primates and humans. *Braz J*  
462 *Infect Dis* 18:535-543.
- 463 Sunbul, M. 2014. Hepatitis B virus genotypes: global distribution and clinical  
464 importance. *World J Gastroenterol* 20:5427-5434.
- 465 Tallavaara, M, M Luoto, N Korhonen, H Jarvinen, H Seppa. 2015. Human population  
466 dynamics in Europe over the Last Glacial Maximum. *Proc Natl Acad Sci U S A*  
467 112:8232-8237.
- 468 Teske, PR, TR Golla, J Sandoval-Castillo, A Emami-Khoyi, CD van der Lingen, S von  
469 der Heyden, B Chiazzari, B Jansen van Vuuren, LB Beheregaray. 2018.  
470 Mitochondrial DNA is unsuitable to test for isolation by distance. *Sci Rep*

471 8:8448.  
472 Yuan, D, S Huang. 2017. On the peopling of the Americas: molecular evidence for the  
473 Paleoamerican and the Solutrean models. bioRxiv bioRxiv 130989; doi:  
474 <https://doi.org/10.1101/130989>  
475 Yuan, D, X Lei, Y Gui, Z Zhu, D Wang, J Yu, S Huang. 2017. Modern human origins:  
476 multiregional evolution of autosomes and East Asia origin of Y and mtDNA.  
477 bioRxiv:doi: <https://doi.org/10.1101/106864>.  
478 Yuan, D, Z Zhu, X Tan, et al. 2012. Minor alleles of common SNPs quantitatively affect  
479 traits/diseases and are under both positive and negative selection.  
480 arXiv:1209.2911.  
481 Yuan, D, Z Zhu, X Tan, et al. 2014. Scoring the collective effects of SNPs: association  
482 of minor alleles with complex traits in model organisms. *Sci China Life Sci*  
483 57:876-888.  
484 Zhu, Z, Q Lu, J Wang, S Huang. 2015a. Collective effects of common SNPs in  
485 foraging decisions in *Caenorhabditis elegans* and an integrative method of  
486 identification of candidate genes. *Sci. Rep.*:doi:10.1038/srep16904.  
487 Zhu, Z, D Yuan, D Luo, X Lu, S Huang. 2015b. Enrichment of Minor Alleles of  
488 Common SNPs and Improved Risk Prediction for Parkinson's Disease. *PLoS*  
489 *ONE* 10:e0133421.  
490  
491

---

## Supplementary Materials

### Genetic continuity in the last seven Millennia in human hepatitis B viruses

Xiaoyun Lei<sup>1,2</sup>, Ye Zhang<sup>1</sup>, and Shi Huang<sup>1\*</sup>

#### Original data on outgroup analyses for Karsdorf using the polymerase amino acid sequence.

Transcriptase starts at 343 VNL....

Karsdorf polymerase protein (had 33 nt deletion)

MPLSYQHFRRLLLLDDEAGPLEEELPRLADEGLNHRVAEDLNLQLPNVSIWTHKVGNT

GLYSSTVPVFNXPWQTPSFPDIHLHQDIINKCEQFVGPLTVNEKRRLQLVMPARFYPNST

KYLPLEKGIKPYYPDNVNVNHYFQTRHYLHTLWKAGILYKRETTTRSASFSGSPYSWEQELQ HGA

KXPFHKQSSRILSRPPVGPVQSKYQQSRLGFQSQGQPLARGQQGRSWSIRARVHPTARR

PFGVEPSVSGHTNNIAS-----KRHSSSGHAVE

IPPNSARSQSEGPVFSCWWLQFRNSKPCSEYCLSHI

343 VNLLEDWGPCTEHGKHHIRIPRTPARVTGGVFLVDKNPHNTTESRLVDFSQFSRG

STRVSWPKFAVPn|qsltn|lssn|swl

s|DVSAAFYHIPLHPAAMPHELLVGSSGLSRYVARLSSDSRILDHQHGTMQNMHDSCSRNL

FVSLMLLYKTFGRKLHLYSHPIILGFRKIPMGVGLSPFLLAQFTSAICSVVRRAFPCLLA

FSYMDDVVLGAKTVQHLESlyTAVTNFLLSLGIHLNPNKTKRWGYSLNFMGYVIGSWGTL

PQDHIIQKIKQCFRKLQVNRPIDWVKVQRIVGLLGFAAPFTQCGYPALMPLYACIQAKQA

FTFSPTYKAFLCKQYLNLYPVARQRPLCQVFADATPTGWGLVMGHQRMRGTFVAPLPIH

TAELLAACFARSRSRSGANLIGTDNSVWLSRKYTSFPWLLGCAANWILRGTSFVYVPSALNP

ADDPSRGLHLGCRPLLRLSYQPTTGRTSLYAVSPSPVSHLPDRVHFASPLHVTWK

Karsdorf nucleotide sequences:

NNNNNNNACATTCCACCAAACCTCTGCAAGATCCCAGAGTGAGGGGCCTGTATTTTCCTGC  
TGGTGGCTCCAGTTCAGGAACAGTAAACCCTGTTCCGAATACTGCCTCTCACACATCGTC  
AATCTTCTCGAGGACTGGGGACCCTGCACCGAACATGGAAAACATCACATCAGGATTCTT  
AGGACCCCTGCTCGCGTTACAGGCGGGTTTTTCTTGTTGACAAAAATCCTCACAATACC  
ACAGAGTCTAGACTCGTGGTGGACTTCTCTCAATTTTCTAGGGGGAGCACCCGTGTGTCT  
TGGCCAAAATTGCGAGTCCCAACCTCCAATCACTACCAACCTCCTGTCTCCAACCTG  
TCCTGGCTATCGCTGGATGTGTCTGCGGCGTTTTATCATATTCCTCTTCATCCTGCTGCT  
ATGCCTCATCTTCTTGTGGTTCTTCTGGACTATCAAGGTATGTTGCCCGTCTGTCTCT  
GATTCCAGGATCCTCGACCACCAGCACGGGACCATGCAGAACATGCACGACTCCTGCTCA  
AGGAACCTCTTTGTATCCCTCATGTTGCTGTACAAAACCTTCGGACGGAAATTGCACCTG  
TATTCCCATCCCATCATCCTGGGCTTTCGAAAATTCCTATGGGAGTGGGCCTCAGTCCG  
TTTCTCCTGGCTCAGTTTACTAGCGCCATTTGTTCAAGTGGTTCGCAGGGCTTTCCCCAC  
TGTTTGGCTTTCAGTTATATGGATGATGTGGTTTTGGGGCCAAGACTGTACAACATCTT  
GAGTCCCTTACACCGCTGTTACTAATTTTCTTTTGTCTTTGGGCATACATTTAAATCCC  
AACAAAACAAAAGATGGGGTTATCCCTAAACTTCATGGGTTATGTAATTGGAAGTTGG  
GGAACATTGCCACAGGATCACATTATCAGAAAATCAAACAATGTTTCAGAAAACCTCCT  
GTTAACAGACCTATTGATTGGAAAGTATGTCAAAGAATTGTGGGTCTTTTGGGCTTTGCC  
GCCCCTTTTACACAATGTGGTTATCCAGCATTAAATGCCTTTATATGCATGTATAACAAGT  
AAGCAGGCTTTCACCTTCTCGCCAACCTTACAAGGCCTTTCTGTGTAACAATATTTGAAC  
CTTTACCCCGTTGCCCGGCAACGGCCAGGTCTGTGCCAAGTGTGCTGATGCAACCCCC  
ACTGGCTGGGGCTTGGTCATGGGCCATCAGCGCATGCGTGGAACCTTTGTGGCTCCTCTG  
CCGATCCATACTGCGGAACTCCTAGCCGCTTGTGTTGCTCGCAGCAGGTCTGGAGCAAAC  
CTTATTGGGACTGATAATTCTGTTGTCTCTCCCGAAATATACATCATTTCCATGGCTG  
CTAGGCTGTGCTGCCAACTGGATCCTGCGCGGGACGTCCTTTGTTTACGTCCCGTCAGCG  
CTGAATCCTGCGGACGACCCCTCTCGGGGCCACTTGGGGCTTTGCCGCCCCCTTCTCCGT  
CTGTCGTACCAGCCGACCACGGGGCGCACCTCTTTACGCGGTCTCCCCGTCTGTGCCT  
TCTCATCTGCCGGACCGTGTGCACTTCGCTTACCTCTGCATGTTACATGGAACCGCCG  
TGAACGCCCCCCGGAACCTGCCAAGGGACTTACATAAGAGGACTCTTGACTCTCAGCAA  
TGTAACAACCAAGATTGAGACATACTCAAAGACTGTGTATTTGAGGAGTGGGAGGAAT  
CAGGCAAGGACACCAGTTAATGACCTTTGATTAGGAGGCTGTAGGCATAAATTGGTCT  
GTTACCAGCACCATGTAACTTTTTACCTCTGCCTAATCATCTCTTGTTCATGTCCTAC  
TGTTCAAGCCTCCAAGTTGTGCTTGGGTGGCTTTTGGGCATGGACATTGACCCATATAA  
AGAATTTGGAGCTACTGTTGAGTTGCTCTCCTTTTTGCCTTCTGACTTTTTTCTTCGGT  
CCGCGATCTTCTCGACACCGCCTCAGCTCTGTACCGGAAGCCTTAGAGTCTCCAGAGCA  
TTGTTACCAAATCACACAGCACTCAGGCAAGCTGTTCTGTGTTGGGGTGGATTAATGAC  
CTTGGCTTCTGGGTGGGCAACAATTTGGAAGATCNNNNNNNNNNNNNNNNNNNNNNNNN  
NNNNNNNNNNNNNNNNNNATGGGTTTAAAAATAAGGCAACTATTGTGGTTTTCACATTTCC  
TGCTTACTTTTGAAGAGAAACGGTCCTTGTGATTTGGTGTCTTTTGGAGTGTGGATT



---

```
CGCACTCCTCCCGCTTACAGACCACCAAATGCCCTATCTTATCAACACTTCCGGAGACT
ACTGTTGTTAGACGACGAGGCAGGTCCCCTAGAAGAAGAACTCCCTCGCCTCGCAGACGA
AGGTCTCAATCACCGCGTCGCAGAAGATCTCAATCTCCAGCTTCCCAATGTTAGTATTCC
TTGGACTCACAAGGTGGGAACTTTACGGGGCTTTATTCTTCTACTGTTCTGTCTTTAA
CCCTNNCTGGCAAACCTCTTCTTTTCTGATATTCAATTTGCATCAAGATATCATTAACAA
ATGCGAACAATTTGTGGGCCCTCTTACAGTAAATGAAAAACGAAGATTACAGTTAGTTAT
GCCTGCTAGATTTTACCCTAACTCTACAAAATATTTGCCCTAGAGAAAGGCATAAAGCC
TTATTATCCAGATAATGTGGTTAATCATTACTTCCAAACCAGACATTATTTACATACTCT
ATGGAAGGCGGGCATCTTATATAAAAGAGAGACAACACGTAGCGCCTCATTTTGTGGGTC
ACCATATTCTTGGGAACAAGAGCTACAGCATGGGGCAGAATCTNNNNNNNNNNNNNNNNN
NNNNNNNNNNNNNNNNNNNNNNNNNNNNNNNTGGAGAAANAACCTTCCACAAGCAAT
CCTCTAGGATTCTTTCCCGACCACCAGTTGGACCCAGCGTTCAGAGCAAATACCAACAAT
CCAGATTGGGATTTCAATCCCAACAAGGACCCTTGCCAGAGGCCAACAAGGTAGGAGCT
GGAGCATTGGGGCCAGGGTTCACCCACCGCACGGAGGCCTTTTGGGGTGGAGCCCTCAG
TCTCAGGGCATACTAACAACATTGCCAGCAAGAGACACTCATCCTCAGGCCATGCAGTGG
AA
```

Karsdorf aligned with Human CCK86662 and chimp AB032433

Region: 306-832 aa

For the 501 amino acid (343-844) slow region, the number of drastic changes among total changes are the following:

Karsdorf 5/10 (among 10 changes that differ between Karsdorf and human/chimp, 5 are drastic)

Human 4/9 (among 9 changes that differ between Human and Karsdorf/chimp, 4 are drastic)

Chimp 11/15 (among 15 changes that differ between Chimp and Karsdorf/human, 11 are drastic)

**Conclusion:** Chimp is the outlier to the clade containing Karsdorf and human HBV CCK86662.

**Alignments performed by blastp:**

.....

Kars. 10

IPPNSARSQSEGPVFSCWWLQFRNSKPCSEYCLSHVNLLEDWGPCTEHGKHHIRIP RTP 189

IPP+S +SQS+GPVFSCWWLQFR+S+PCS+YCLSH+VNLL+DWGPCTEHG+HHIRIP RTP

Human 306

IPPSSTKSQSQGPVFSCWWLQFRDSEPCSDYCLSHLVNLLQDWGPCTEHGEHHIRIP RTP 365

chimp 306

KGPVFSCWWLQFRNIEPCSEYCLSHLVSLLDWGPCNEHGEHHIRIP RTP

365

Informative changes are highlighted in yellow. Green positions show all three to have different residues, which are not informative and not counted.

1. Karsdorf as candidate outgroup
2. Human as candidate outgroup
3. Chimp as candidate outgroup

1. 0/3 (among 3 changes that differ between Karsdorf and human/chimp, 0 are drastic)
2. 0/2 (among 2 changes that differ between Human and Karsdorf/chimp, 0 are drastic)
3. 2/2 (among 2 changes that differ between Chimp and Karsdorf/human, 2 are drastic)

343 slow region

1 0/1

---

2 0/0

3 2/2

Kars. 190 ARVTGGVFLVDKNPHNTESRLVVDFSQFSRGSTRVSWPKFAVPnlqsltnllssnlswl 369

ARVTGGVFLVDKNPHNT ESRLVVDFSQFSRGS

RVSWPKFAVPNLQSLTNLLSSNLSWL

Sbjct 366

ARVTGGVFLVDKNPHNTAESRLVVDFSQFSRGSARVSWPKFAVPNLQSLTNLLSSNLSWL 425

Sbjct 366

ARITGGVFLVDKNPHNTAESRLVVDFSQFSRGSTRVWPVKFAVPNLQSLTNLLSSNLSWL 425

1. 1/1

2. 1/1

3. 1/1

Kars. 370

sLDVSAAFYHIPLHPAAMPHELLVGSSGLSRYVARLSSDSRILDHQHGTMQNMHDSCSRNL 549

SLDVSAAFYHIPLHPAAMPHELLVGSSGLSRYVARLSSDSRILDHQHG+QN+HDSCSR L

Sbjct 426 SLDVSAAFYHIPLHPAAMPHELLVGSSGLSRYVARLSSDSRILDHQHGTLQNLHDSCSRQL

485

---

Sbjct 426

SLDVSAAFYHLPLHPAAMPHELLVGSSGLSRYVARLSSNSRILDHQHGTMQNLHDSCSRNL 485

1. 0/1

2. 1/2

3. 0/1

Kars. 550 FVSLMLLYKTFGRKLHLYSHPIILGFRKIPMGVGLSPFLLAQFTSAICSVVRRAPFHCLA

729

+VSLMLLYKTFGRKLHLYSHPIILGFRKIPMGVGLSPFLLAQFTSAICSVVRRAPFHCLA

Sbjct 486 YVSLMLLYKTFGRKLHLYSHPIILGFRKIPMGVGLSPFLLAQFTSAICSVVRRAPFHCLA

545

Sbjct 486 FDSLMLLYKTFGRKLHLYSHPIILMGFRKIPMGVGLSPFLLAQFTSAICSVVRRAPFHCLA

545

1. 0/0

2. 0/1

3. 1/2

---

Kars. 730

FSYMDDVVLGAKTVQHLESlyTAVTNFLLSLGIHLNPNKTKRWGYSlnFMGYVIGSWGTL 909

FSYMDDVVLGAK+VQHLESlyTAVTNFLLSLGIHLNPNKTKRWGYSlnFMGYVIGSWGTL

Sbjct 546

FSYMDDVVLGAKSVQHLESlyTAVTNFLLSLGIHLNPNKTKRWGYSlnFMGYVIGSWGTL 605

Sbjct 546

FSYMDDVVLGAKSVQHLESlyTAVTNFLLSLGIHLNPNKTKRWGYSlnHFMGYVIGSWGTL 605

1. 0/1

2. 0/0

3. 1/1

Kars. 910 PQDHIIQKIKQCfRKLpVnRPIDWkVCQRIVGLLGFaAPFTQCGYPALMPLYACIQAKQA

1089

PQ+HI QKIKQCfRKLpVnRPIDWkVCQRi GLLGFaAPFTQCGYPALMPLYACIQAKQA

Sbjct 606 PQEHITQKIKQCfRKLpVnRPIDWkVCQRITGLLGFaAPFTQCGYPALMPLYACIQAKQA

665

Sbjct 606 PQEHIVQKIKNCfRKLpVnRPIDWkVCQRIVGLLGFaAPFTQCGYPALMPLYACIQAKQA

665

1. 0/1

---

2. 0/0

3. 0/1

Kars. 1090

FTFSPTYKAFLCKQYLNLYPVARQRPGLCQVFADATPTGWGLVMGHQRMRTFVAPLPIH 1269

FTFSPTYKAFLCKQY+NLYPVARQRPGLCQVFADATPTGWGL

+GHQRMRTFVAPLPIH

Sbjct 666

FTFSPTYKAFLCKQYMNLYPVARQRPGLCQVFADATPTGWGLAIGHQRMRTFVAPLPIH 725

Sbjct 666

FTFSPTYKAFLSQYSTLYPVARQRSGLCQVFADATPTGWGLVMGHQRMRTFVAPLPIH 725

1. 1/2

2. 1/2

3. 3/3

Kars. 1270 TAELLAACFARSRSGANLIGTDNSVLSRKYTSFPWLLGCAANWILRGTSFVYVPSALNP

1449

---

TAELLAACFARSRSGA LIGTDNSVLSRKYTSFPWLLGCAANWILRGTSFVYVPSALNP

Sbjct 726 TAELLAACFARSRSGAKLIGTDNSVLSRKYTSFPWLLGCAANWILRGTSFVYVPSALNP

785

Sbjct 726 TAELLAACFARSRSGAKLIGTDNSVLSRKYTSFPWLLGCAANWILRGTSFVYVPSALNP

785

1. 1/1

2. 0/0

3. 0/0

Kars. 1450 ADDPSRGHLGLCRPLLRLSYQPTTGRTSLYAVSPSPSHLPDRVHFASPLHVTWK

1614

ADDPSRG LGLCRPLLRL + PTTGRTSLYAVSPSPSHLPDRVHFASPLHVTWK

Sbjct 786 ADDPSRGRLGLCRPLLRLPFLPTTGRTSLYAVSPSPSHLPDRVHFASPLHVTWK 840

Sbjct 786 ADDPSRGRLGLYRPLIRLLFQPTTGRTSLYAVSPSPSHLPVVRVHFASPLHVAWR 830

1. 1/2

2. 1/1

3. 3/4
